# Supplementary material for: Timing and factors associated with first antenatal care booking among pregnant mothers in Gondar Town; North West Ethiopia
Source: BMC Pregnancy Childbirth. 2014 Aug 25;14:287. doi: 10.1186/1471-2393-14-287 (PMC4152591; doi:10.1186/1471-2393-14-287)
Supplement: Supplementary file 1 — Additional file 1: English questionnaire. (PDF 186 KB) [file 12884_2013_1160_MOESM1_ESM.pdf]

## 10.1 Annex -I- English questionnaire

### University of Gondar College of Medicine and Health Sciences

#### Department of Midwifery

Questionnaires to assess the timing at first antenatal care booking and associated factors among pregnant mothers attending ANC clinics at health institutions in Gondar town, North West Ethiopia.

Hello, my name is \_\_\_\_\_ and I am staff in this health facility and working with Temesgen Worku, MSc. Midwifery student at University of Gondar. As part of this survey, we are collecting information on timing at first antenatal care booking and associated factors among pregnant mothers attending ANC clinics at health institutions in Gondar town. We will include all mothers who came for usual ANC visit. The survey will take about 25 minutes.

The questionnaire includes socio-demographic and obstetric factors. All information you provide will be kept confidential. I will not include any identifiers, such as your name or exact address. Only honest answers would contribute for improvement of health planning. Your role in the success of the research is important and I appreciate your contribution to the research. Would this be okay for you?

I understand about the advantage of the research and the roles I will have in the research. I have agreed to participate in the research.      **A. Yes**      **B. No**

If respondent agrees to be interviewed,

Starting time \_\_\_\_\_:      End time: \_\_\_\_\_

**Thank you for your participation!**

Date of data collection \_\_\_\_\_

Name of data collector \_\_\_\_\_ Signature \_\_\_\_\_

Name of supervisor \_\_\_\_\_ Signature \_\_\_\_\_

### Section 1: Socio-demographic information

| Q.No | Question                                    | Code                                                                                                                                                      | Go To Q                             |
|------|---------------------------------------------|-----------------------------------------------------------------------------------------------------------------------------------------------------------|-------------------------------------|
| 101  | Age                                         | ----- Years                                                                                                                                               |                                     |
| 102  | Marital status                              | 01. Single<br>02. Cohabit<br>03. Married<br>04. Widowed<br>05. Divorced                                                                                   | <b>If not married<br/>Go to 106</b> |
| 103  | If married; type of marriage                | 01. Arranged<br>02. Love<br>97. Others(specify) -----                                                                                                     |                                     |
| 104  | If married; Age at marriage                 | ----- Years                                                                                                                                               |                                     |
| 105  | Age difference between you and your husband | ----- Years                                                                                                                                               |                                     |
| 106  | Residence                                   | 01. Urban<br>02. Rural                                                                                                                                    |                                     |
| 108  | Religion                                    | 01. Orthodox<br>02. Catholic<br>03. Protestant<br>04. Muslim<br>97. Others(specify) -----                                                                 |                                     |
| 109  | Ethnicity                                   | 01. Amhara<br>02. Tigrie<br>03. Oromo<br>97. Others(specify) -----                                                                                        |                                     |
| 110  | Occupation                                  | 01. House wife<br>02. Government employee<br>03. Privet employee<br>04. Privet business<br>97. Others(specify) -----                                      |                                     |
| 111  | Educational status                          | 01. ----- class completed<br>02. College/University completed                                                                                             |                                     |
| 112  | What is your profession?                    | 01. Health science<br>02. Education<br>03. Agriculture<br>04. Business & Social sciences<br>05. Non health natural sciences<br>97. Others (Specify) _____ |                                     |
| 113  | Monthly house hold income in Ethiopian Birr | _____ Birr                                                                                                                                                |                                     |
| 114  | How far your home from this institution?    | _____ Km                                                                                                                                                  |                                     |
| 115  | Family Size                                 | _____                                                                                                                                                     |                                     |

**Questions Number 116-120 will be asked if the answer for question number 102 is married/cohabit.**

|     |                                    |                                                                                                                                                           |  |
|-----|------------------------------------|-----------------------------------------------------------------------------------------------------------------------------------------------------------|--|
| 116 | Husband's age                      | -----                                                                                                                                                     |  |
| 117 | Husband's occupation               | 01. Farmer<br>02. Government employee<br>03. Private employee<br>04. Private business<br>97. Other; specify _____                                         |  |
| 118 | Husband's Religion                 | 01. Orthodox<br>02. Catholic<br>03. Protestant<br>04. Muslim<br>97. Others(specify)                                                                       |  |
| 119 | Husband's educational status       | 01.----- class completed<br>02. College/University completed                                                                                              |  |
| 120 | What is your husband's profession? | 01. Health science<br>02. Education<br>03. Agriculture<br>04. Business & Social sciences<br>05. Non health natural sciences<br>97. Others (Specify) _____ |  |

## Section 2: Obstetrics Related Information

| Q.No | Question                                                             | Code                                                                                                                                                                                      | Go To Q                         |
|------|----------------------------------------------------------------------|-------------------------------------------------------------------------------------------------------------------------------------------------------------------------------------------|---------------------------------|
| 201  | Is it your first time pregnancy?                                     | 01. Yes<br>02. No                                                                                                                                                                         | <b>If yes<br/>Go to<br/>212</b> |
| 202  | How many times in total you became pregnant?                         | _____                                                                                                                                                                                     |                                 |
| 203  | How many times in total you gave birth?                              | _____                                                                                                                                                                                     |                                 |
| 204  | How many of your pregnancies resulted in a baby that was born alive? | _____                                                                                                                                                                                     |                                 |
| 205  | How many of your pregnancies resulted in a baby that was born dead?  | _____                                                                                                                                                                                     |                                 |
| 206  | Is any of your previous pregnancy ended with abortion?               | 01. Yes<br>02. No                                                                                                                                                                         |                                 |
| 207  | Have you had antenatal care for the past pregnancies?                | 01. Yes<br>02. No                                                                                                                                                                         |                                 |
| 208  | Was there any complication in previous pregnancy/ies?                | 01. Yes<br>02. No                                                                                                                                                                         |                                 |
| 209  | If Yes for Q-208, what was it?                                       | 01. Vomiting<br>02. Sever head ache<br>03. Decrease fetal movement<br>04. Amniotic fluid leakage<br>05. Vaginal bleeding<br>06. Abortion<br>07. Hypertension<br>97. Others, specify ----- |                                 |

## Section 2: Obstetrics Related Information

| Q.No                                       | Question                                                              | Code                                                                                                                                                                                             | Go To Q |
|--------------------------------------------|-----------------------------------------------------------------------|--------------------------------------------------------------------------------------------------------------------------------------------------------------------------------------------------|---------|
| 210                                        | Have you had any complication during previous labor and delivery/ies? | 01. Yes<br>02. No                                                                                                                                                                                |         |
| 211                                        | If yes, what was it?                                                  | 01. Pre-term labor<br>02. Prolonged labor<br>03. Fetal death/still birth<br>04. Amniotic fluid leakage<br>05. PPH<br>06. Retained pregnancy<br>07. Puerperal sepsis<br>97. Others, specify ----- |         |
| 212                                        | Have you had any previous caesarean birth?                            | 01. Yes<br>02. No                                                                                                                                                                                |         |
| <b>Current Pregnancy Related Questions</b> |                                                                       |                                                                                                                                                                                                  |         |
| 213                                        | By what means you recognized that you are pregnant?                   | 01. Missing period<br>02. Urine test<br>97. Other; specify_____                                                                                                                                  |         |
| 214                                        | Is this pregnancy approved by your husband and family?                | 01. Yes<br>02. No                                                                                                                                                                                |         |
| 215                                        | Is this pregnancy planned?                                            | 01. Yes<br>02. No                                                                                                                                                                                |         |
| 216                                        | What is your financial source for this ANC service expenses?          | 01. My self<br>02. My husband<br>03. Me and my husband<br>97. Other; specify_____                                                                                                                |         |

## Section 2: Obstetrics Related Information

| Q.No | Question                                                                           | Code                                                                                                                                                                                      | Go To Q |
|------|------------------------------------------------------------------------------------|-------------------------------------------------------------------------------------------------------------------------------------------------------------------------------------------|---------|
| 217  | Have you had any one or more of the following complications during this pregnancy? | 01. Vomiting<br>02. Sever head ache<br>03. Decrease fetal movement<br>04. Amniotic fluid leakage<br>05. Vaginal bleeding<br>06. Abortion<br>07. Hypertension<br>97. Others, specify ----- |         |
| 218  | For this pregnancy, at what gestational age you first booked to antenatal care.    | _____ Months                                                                                                                                                                              |         |
| 219  | Why you booked during this/that period?                                            | 01. I thought it is the right time<br>02. Misconception of the right time and its purpose<br>03. I didn't know that I'm pregnant<br>04. Ignorance<br>05. Other, specify _____             |         |
| 220  | When do you think the appropriate time for first antenatal care booking?           | At _____ Months                                                                                                                                                                           |         |
| 221  | Did you get any information when to book to ANC?                                   | 01. Yes<br>02. No                                                                                                                                                                         |         |
| 222  | If yes for Q-221, what is/was the source of information?                           | 01. Health workers<br>02. Friends<br>03. Media<br>97. Other, specify_____                                                                                                                 |         |

### SECTION 3: Questions used to asses Decision making status of women

| S. No       | Questions                                                                                                                                                                                                                                                                                                                                                                                                                                                                                                                         | Response                                                                                                                                                                                                                                                                                                                                                                                                                                                                                                                                                                                                                                                                                                                                                                                                                                                                                                                | Code   |     |    |    |             |         |         |        |       |       |       |       |       |       |       |       |       |       |       |       |       |       |       |       |       |       |       |       |       |       |       |       |       |       |       |       |       |       |       |       |       |       |       |       |       |       |       |       |       |       |       |       |  |
|-------------|-----------------------------------------------------------------------------------------------------------------------------------------------------------------------------------------------------------------------------------------------------------------------------------------------------------------------------------------------------------------------------------------------------------------------------------------------------------------------------------------------------------------------------------|-------------------------------------------------------------------------------------------------------------------------------------------------------------------------------------------------------------------------------------------------------------------------------------------------------------------------------------------------------------------------------------------------------------------------------------------------------------------------------------------------------------------------------------------------------------------------------------------------------------------------------------------------------------------------------------------------------------------------------------------------------------------------------------------------------------------------------------------------------------------------------------------------------------------------|--------|-----|----|----|-------------|---------|---------|--------|-------|-------|-------|-------|-------|-------|-------|-------|-------|-------|-------|-------|-------|-------|-------|-------|-------|-------|-------|-------|-------|-------|-------|-------|-------|-------|-------|-------|-------|-------|-------|-------|-------|-------|-------|-------|-------|-------|-------|-------|-------|-------|-------|-------|--|
| 301         | <p>Who is in your family usually has final say in the following decisions</p> <p>1. Your own health care?</p> <p>2. Using Current ANC</p> <p>3. Making large household purchase eg</p> <p>3.1. land,</p> <p>3.2. constructing house,</p> <p>3.3. cow,</p> <p>3.4. changing residence</p> <p>3.5. TV,</p> <p>4. Making household purchase for daily need( salt, onione,...)</p> <p>5. Visits to family, friends or relatives</p> <p>6. What food should be cooked everyday</p> <p>7. What to do if a family member become sick</p> | <table> <tr> <td>01</td><td>0 2</td><td>03</td><td>97</td></tr> <tr> <td>Women alone</td><td>Husband</td><td>Jointly</td><td>Others</td></tr> <tr> <td>_____</td><td>_____</td><td>_____</td><td>_____</td></tr> </table> | 01     | 0 2 | 03 | 97 | Women alone | Husband | Jointly | Others | _____ | _____ | _____ | _____ | _____ | _____ | _____ | _____ | _____ | _____ | _____ | _____ | _____ | _____ | _____ | _____ | _____ | _____ | _____ | _____ | _____ | _____ | _____ | _____ | _____ | _____ | _____ | _____ | _____ | _____ | _____ | _____ | _____ | _____ | _____ | _____ | _____ | _____ | _____ | _____ | _____ | _____ | _____ | _____ |  |
| 01          | 0 2                                                                                                                                                                                                                                                                                                                                                                                                                                                                                                                               | 03                                                                                                                                                                                                                                                                                                                                                                                                                                                                                                                                                                                                                                                                                                                                                                                                                                                                                                                      | 97     |     |    |    |             |         |         |        |       |       |       |       |       |       |       |       |       |       |       |       |       |       |       |       |       |       |       |       |       |       |       |       |       |       |       |       |       |       |       |       |       |       |       |       |       |       |       |       |       |       |       |       |  |
| Women alone | Husband                                                                                                                                                                                                                                                                                                                                                                                                                                                                                                                           | Jointly                                                                                                                                                                                                                                                                                                                                                                                                                                                                                                                                                                                                                                                                                                                                                                                                                                                                                                                 | Others |     |    |    |             |         |         |        |       |       |       |       |       |       |       |       |       |       |       |       |       |       |       |       |       |       |       |       |       |       |       |       |       |       |       |       |       |       |       |       |       |       |       |       |       |       |       |       |       |       |       |       |  |
| _____       | _____                                                                                                                                                                                                                                                                                                                                                                                                                                                                                                                             | _____                                                                                                                                                                                                                                                                                                                                                                                                                                                                                                                                                                                                                                                                                                                                                                                                                                                                                                                   | _____  |     |    |    |             |         |         |        |       |       |       |       |       |       |       |       |       |       |       |       |       |       |       |       |       |       |       |       |       |       |       |       |       |       |       |       |       |       |       |       |       |       |       |       |       |       |       |       |       |       |       |       |  |
| _____       | _____                                                                                                                                                                                                                                                                                                                                                                                                                                                                                                                             | _____                                                                                                                                                                                                                                                                                                                                                                                                                                                                                                                                                                                                                                                                                                                                                                                                                                                                                                                   | _____  |     |    |    |             |         |         |        |       |       |       |       |       |       |       |       |       |       |       |       |       |       |       |       |       |       |       |       |       |       |       |       |       |       |       |       |       |       |       |       |       |       |       |       |       |       |       |       |       |       |       |       |  |
| _____       | _____                                                                                                                                                                                                                                                                                                                                                                                                                                                                                                                             | _____                                                                                                                                                                                                                                                                                                                                                                                                                                                                                                                                                                                                                                                                                                                                                                                                                                                                                                                   | _____  |     |    |    |             |         |         |        |       |       |       |       |       |       |       |       |       |       |       |       |       |       |       |       |       |       |       |       |       |       |       |       |       |       |       |       |       |       |       |       |       |       |       |       |       |       |       |       |       |       |       |       |  |
| _____       | _____                                                                                                                                                                                                                                                                                                                                                                                                                                                                                                                             | _____                                                                                                                                                                                                                                                                                                                                                                                                                                                                                                                                                                                                                                                                                                                                                                                                                                                                                                                   | _____  |     |    |    |             |         |         |        |       |       |       |       |       |       |       |       |       |       |       |       |       |       |       |       |       |       |       |       |       |       |       |       |       |       |       |       |       |       |       |       |       |       |       |       |       |       |       |       |       |       |       |       |  |
| _____       | _____                                                                                                                                                                                                                                                                                                                                                                                                                                                                                                                             | _____                                                                                                                                                                                                                                                                                                                                                                                                                                                                                                                                                                                                                                                                                                                                                                                                                                                                                                                   | _____  |     |    |    |             |         |         |        |       |       |       |       |       |       |       |       |       |       |       |       |       |       |       |       |       |       |       |       |       |       |       |       |       |       |       |       |       |       |       |       |       |       |       |       |       |       |       |       |       |       |       |       |  |
| _____       | _____                                                                                                                                                                                                                                                                                                                                                                                                                                                                                                                             | _____                                                                                                                                                                                                                                                                                                                                                                                                                                                                                                                                                                                                                                                                                                                                                                                                                                                                                                                   | _____  |     |    |    |             |         |         |        |       |       |       |       |       |       |       |       |       |       |       |       |       |       |       |       |       |       |       |       |       |       |       |       |       |       |       |       |       |       |       |       |       |       |       |       |       |       |       |       |       |       |       |       |  |
| _____       | _____                                                                                                                                                                                                                                                                                                                                                                                                                                                                                                                             | _____                                                                                                                                                                                                                                                                                                                                                                                                                                                                                                                                                                                                                                                                                                                                                                                                                                                                                                                   | _____  |     |    |    |             |         |         |        |       |       |       |       |       |       |       |       |       |       |       |       |       |       |       |       |       |       |       |       |       |       |       |       |       |       |       |       |       |       |       |       |       |       |       |       |       |       |       |       |       |       |       |       |  |
| _____       | _____                                                                                                                                                                                                                                                                                                                                                                                                                                                                                                                             | _____                                                                                                                                                                                                                                                                                                                                                                                                                                                                                                                                                                                                                                                                                                                                                                                                                                                                                                                   | _____  |     |    |    |             |         |         |        |       |       |       |       |       |       |       |       |       |       |       |       |       |       |       |       |       |       |       |       |       |       |       |       |       |       |       |       |       |       |       |       |       |       |       |       |       |       |       |       |       |       |       |       |  |
| _____       | _____                                                                                                                                                                                                                                                                                                                                                                                                                                                                                                                             | _____                                                                                                                                                                                                                                                                                                                                                                                                                                                                                                                                                                                                                                                                                                                                                                                                                                                                                                                   | _____  |     |    |    |             |         |         |        |       |       |       |       |       |       |       |       |       |       |       |       |       |       |       |       |       |       |       |       |       |       |       |       |       |       |       |       |       |       |       |       |       |       |       |       |       |       |       |       |       |       |       |       |  |
| _____       | _____                                                                                                                                                                                                                                                                                                                                                                                                                                                                                                                             | _____                                                                                                                                                                                                                                                                                                                                                                                                                                                                                                                                                                                                                                                                                                                                                                                                                                                                                                                   | _____  |     |    |    |             |         |         |        |       |       |       |       |       |       |       |       |       |       |       |       |       |       |       |       |       |       |       |       |       |       |       |       |       |       |       |       |       |       |       |       |       |       |       |       |       |       |       |       |       |       |       |       |  |
| _____       | _____                                                                                                                                                                                                                                                                                                                                                                                                                                                                                                                             | _____                                                                                                                                                                                                                                                                                                                                                                                                                                                                                                                                                                                                                                                                                                                                                                                                                                                                                                                   | _____  |     |    |    |             |         |         |        |       |       |       |       |       |       |       |       |       |       |       |       |       |       |       |       |       |       |       |       |       |       |       |       |       |       |       |       |       |       |       |       |       |       |       |       |       |       |       |       |       |       |       |       |  |

**Thank you very much!**
