# Supplementary material for: Timing and factors associated with first antenatal care booking among pregnant mothers in Gondar Town; North West Ethiopia
Source: BMC Pregnancy Childbirth. 2014 Aug 25;14:287. doi: 10.1186/1471-2393-14-287 (PMC4152591; doi:10.1186/1471-2393-14-287)
Supplement: Supplementary file 2 — Additional file 2:: STROBE Statement check list. (PDF 68 KB) [file 12884_2013_1160_MOESM2_ESM.pdf]

**Topic of study:** Timing and factors associated with first antenatal care booking among pregnant mothers in Gondar Town; North West Ethiopia

ID. 1440044905913809

STROBE Statement—Checklist of items that should be included in reports of *cross-sectional studies*

|                              | Item No | Recommendation                                                                                                                                                                                                                                                                                       |
|------------------------------|---------|------------------------------------------------------------------------------------------------------------------------------------------------------------------------------------------------------------------------------------------------------------------------------------------------------|
| <b>Title and abstract</b>    | 1       | (a) Study design is indicated in the abstract, methods section as a health institution based cross-sectional study design.<br>(b) A balanced summary of what was done and what was found is provided in the methods and result section of the abstract                                               |
| <b>Introduction</b>          |         |                                                                                                                                                                                                                                                                                                      |
| Background/rationale         | 2       | Scientific background and rationale for the investigation is precisely reported here.                                                                                                                                                                                                                |
| Objectives                   | 3       | Specific objectives are stated as the final sentence of last paragraph under background session                                                                                                                                                                                                      |
| <b>Methods</b>               |         |                                                                                                                                                                                                                                                                                                      |
| Study design                 | 4       | It is presented in the first sentence of first paragraph of methods session.                                                                                                                                                                                                                         |
| Setting                      | 5       | A brief detail of the setting, locations and study period is described in the first paragraph as well.                                                                                                                                                                                               |
| Participants                 | 6       | (a) Eligibility criteria, the sources and methods of selection of participants are clearly stated in 2 <sup>nd</sup> and 3 <sup>rd</sup> paragraphs of methods session.                                                                                                                              |
| Variables                    | 7       | Both outcome and explanatory variables are defined in the 5 <sup>th</sup> and 6 <sup>th</sup> paragraphs of methods session.                                                                                                                                                                         |
| Data sources/<br>measurement | 8*      | Source of data and data analysis methods are discussed in the 4 <sup>th</sup> and 7 <sup>th</sup> paragraphs of methods session.                                                                                                                                                                     |
| Bias                         | 9       | Efforts to address potential sources of bias were described under 4 <sup>th</sup> & 7 <sup>th</sup> paragraphs of methods session.                                                                                                                                                                   |
| Study size                   | 10      | How the study size was arrived at is explain in the 3 <sup>rd</sup> paragraphs of methods session.                                                                                                                                                                                                   |
| Quantitative variables       | 11      | All quantitative variables treated as qualitative after categorizing them in one of most commonly used categories.                                                                                                                                                                                   |
| Statistical methods          | 12      | (a) Statistical methods used in this study are described in the 7 <sup>th</sup> paragraph of this session.<br>(b) There are no subgroups in this study.<br>(c) There was no missing data in this study<br>(d) Not applicable<br>(e) Not applicable                                                   |
| <b>Results</b>               |         |                                                                                                                                                                                                                                                                                                      |
| Participants                 | 13*     | (a) Number of participants is presented in the first paragraph of results session and detail socio-demographic characteristics in the table 1 too.<br>(b) There was no non-participation during this study<br>(c) This was cross-sectional study so; there is no flow as that of longitudinal study. |
| Descriptive data             | 14*     | (a) Characteristics of study participants (eg demographic, clinical, social) and information on exposures and potential confounders is presented in tables 1 & 2<br>(b) There was no missing data.                                                                                                   |
| Outcome data                 | 15*     | Outcome variable is discussed and summarised under table 2 and figure 1.                                                                                                                                                                                                                             |

|                          |    |                                                                                                                                                                                                                                                                         |
|--------------------------|----|-------------------------------------------------------------------------------------------------------------------------------------------------------------------------------------------------------------------------------------------------------------------------|
| Main results             | 16 | (a) Unadjusted estimates and confounder-adjusted estimates and their precision (eg, 95% confidence interval) are presented in table 3.<br>(b) Category boundaries for continuous variables were categorized and reported in all three tables.<br>(c) We used odds ratio |
| Other analyses           | 17 | Other analyses is not done                                                                                                                                                                                                                                              |
| <b>Discussion</b>        |    |                                                                                                                                                                                                                                                                         |
| Key results              | 18 | Key results to study objectives are discussed under discussion session with references.                                                                                                                                                                                 |
| Limitations              | 19 | Limitations related to the current study are discussed in the final paragraph of discussion session on the way of viewing direction for researchers.                                                                                                                    |
| Interpretation           | 20 | A cautious overall interpretation of results considering objectives, results from similar studies, and other relevant evidence is discussed under discussion session.                                                                                                   |
| Generalisability         | 21 | Generalisability (external validity) of the study results is pointed out under discussion and conclusion sessions.                                                                                                                                                      |
| <b>Other information</b> |    |                                                                                                                                                                                                                                                                         |
| Funding                  | 22 | Information regarding the source of funding and the role of the funders for the present study is presented under acknowledgment session.                                                                                                                                |
